# Supplementary material
Source: publisher site journal article supplement (https://www.dovepress.com/article/477633)
Supplement: Supplementary file 1 [file get_supplementary_file.php]

| **Table S1** Pathways in the figure after limma analysis of GSVA | | | | | |
| --- | --- | --- | --- | --- | --- |
| Tag | logFC | AveExpr | t | P.Value | B |
| REACTOME_SIGNALING_BY_LRP5_MUTANTS | 0.561966777 | 0.026769002 | 4.584383537 | 4.83E-05 | 1.820055796 |
| REACTOME_ACETYLCHOLINE_INHIBITS_CONTRACTION_OF_OUTER_HAIR_CELLS | 0.537451199 | 0.005969816 | 4.171011334 | 0.000169821 | 0.752045694 |
| REACTOME_SYNTHESIS_OF_PROSTAGLANDINS_PG_AND_THROMBOXANES_TX | 0.421092383 | 0.004347347 | 4.124633858 | 0.000195155 | 0.633882008 |
| WP_CELL_DIFFERENTIATION_INDEX | 0.385855456 | 0.002268764 | 4.124133965 | 0.000195447 | 0.632610484 |
| WP_NEPHROGENESIS | 0.32049847 | 0.003654117 | 3.994267661 | 0.000287771 | 0.303920712 |
| REACTOME_PRE_NOTCH_PROCESSING_IN_THE_ENDOPLASMIC_RETICULUM | 0.394571802 | 0.003311168 | 3.946831231 | 0.000331133 | 0.184719407 |
| BIOCARTA_SPRY_PATHWAY | 0.324916974 | 0.017355466 | 3.926516751 | 0.000351589 | 0.133821129 |
| REACTOME_OREXIN_AND_NEUROPEPTIDES_FF_AND_QRFP_BIND_TO_THEIR_RESPECTIVE_RECEPTORS | 0.403574456 | 0.024843833 | 3.803151273 | 0.000504853 | -0.173241698 |
| REACTOME_RUNX1_REGULATES_TRANSCRIPTION_OF_GENES_INVOLVED_IN_INTERLEUKIN_SIGNALING | 0.448374138 | -0.008822176 | 3.792470588 | 0.000520821 | -0.199655134 |
| REACTOME_TYROSINE_CATABOLISM | 0.49490644 | -0.012983283 | 3.737791574 | 0.000610537 | -0.334426835 |
| WP_TCA_CYCLE_AND_DEFICIENCY_OF_PYRUVATE_DEHYDROGENASE_COMPLEX_PDHC | -0.406311756 | -0.023206976 | -4.343151049 | 0.000100982 | 1.193823003 |
| REACTOME_PIWI_INTERACTING_RNA_PIRNA_BIOGENESIS | -0.264403053 | -0.02202547 | -3.770042152 | 0.00055596 | -0.255028165 |
| WP_LNCRNAMEDIATED_MECHANISMS_OF_THERAPEUTIC_RESISTANCE | -0.349520404 | 0.008754359 | -3.740219194 | 0.000606255 | -0.32845953 |
| REACTOME_DEADENYLATION_OF_MRNA | -0.204439495 | -0.034680995 | -3.306404372 | 0.002073264 | -1.367706062 |
| REACTOME_REELIN_SIGNALLING_PATHWAY | -0.411081272 | -0.036414622 | -3.262140743 | 0.002342169 | -1.470319859 |
| REACTOME_FERTILIZATION | -0.229527864 | -0.012620704 | -3.168657791 | 0.003023077 | -1.684682466 |
| REACTOME_SUMO_IS_PROTEOLYTICALLY_PROCESSED | -0.298891421 | 0.009480501 | -2.915799009 | 0.005926258 | -2.247199644 |
| REACTOME_SPERM_MOTILITY_AND_TAXES | -0.34159178 | -0.006743811 | -2.89294039 | 0.006289829 | -2.296716633 |
| WP_INTERLEUKIN1_INDUCED_ACTIVATION_OF_NFKAPPAB | -0.30571015 | 1.70E-05 | -2.853879557 | 0.0069598 | -2.380789339 |
| REACTOME_STING_MEDIATED_INDUCTION_OF_HOST_IMMUNE_RESPONSES | -0.181548134 | 0.002839088 | -2.135054594 | 0.039275136 | -3.789014826 |
